# Supplementary material for: Identification of Iron Metabolism-Related Gene Signatures for Predicting the Prognosis of Patients With Sarcomas
Source: Front Oncol. 2021 Jan 7;10:599816. doi: 10.3389/fonc.2020.599816 (PMC7817539; doi:10.3389/fonc.2020.599816)
Supplement: Supplementary file 4 [file Table_3.xlsx]

## Sheet: Supplementary file 3
id	futime	fustat	NCOA4	ISCU	SLC25A37	BMP6	SLC48A1
TCGA-3B-A9HI-01A	2.16583	1	4.98633	4.56364	4.02055	1.96864	2.93244
TCGA-3B-A9HJ-01A	3.0225	0	5.94594	5.13333	2.36992	2.29841	2.90441
TCGA-3B-A9HL-01A	0.626667	1	5.51469	3.94911	1.97431	1.78224	2.27299
TCGA-3B-A9HO-01A	1.62917	1	5.49111	4.72284	1.18304	0.98052	3.24356
TCGA-3B-A9HP-01A	3.2525	1	4.46844	4.81578	2.88938	1.24471	3.30887
TCGA-3B-A9HQ-01A	5.70833	0	5.00246	4.8837	1.98091	0.350702	2.81936
TCGA-3B-A9HR-01A	5.40417	1	4.25921	4.07465	1.11852	1.39841	2.92032
TCGA-3B-A9HS-01A	2.57917	1	5.28397	3.94022	1.64001	1.6651	1.89289
TCGA-3B-A9HT-01A	1.83417	1	5.5	4.30673	2.85897	0.508521	2.56451
TCGA-3B-A9HU-01A	2.0425	1	4.95617	3.97987	1.98962	0.889358	2.96854
TCGA-3B-A9HV-01A	0.783333	1	4.63016	4.39138	1.71626	0.249071	2.63606
TCGA-3B-A9HX-01A	3.5675	0	4.96673	3.87574	3.4294	2.69381	2.76471
TCGA-3B-A9HY-01A	0.86	0	4.64427	4.0648	2.18417	0.473741	2.57432
TCGA-3B-A9HZ-01A	1.495	1	5.30761	3.86376	2.03196	1.1124	2.43307
TCGA-3B-A9I0-01A	1.37667	1	4.59942	4.8295	2.15183	0.865441	3.12695
TCGA-3B-A9I1-01A	0.870833	1	5.509	4.66915	2.52918	0.803858	3.88615
TCGA-3B-A9I3-01A	0.238333	1	4.85949	3.88493	2.60963	1.91173	2.60583
TCGA-DX-A1KU-01A	0.2575	1	5.61894	4.0059	2.44072	0.451535	3.30108
TCGA-DX-A1KX-01A	5.71333	0	5.50135	3.66292	1.24103	2.61733	2.4207
TCGA-DX-A1KY-01A	0.560833	1	4.86746	3.89473	2.63948	3.41147	1.93975
TCGA-DX-A1KZ-01A	3.5425	1	5.41767	5.21545	1.40876	0.919289	2.15109
TCGA-DX-A1L0-01A	0.281667	1	4.93604	4.35611	2.14299	1.43428	2.16281
TCGA-DX-A1L1-01A	1.56833	1	6.10409	4.63116	2.13171	0.710154	2.47555
TCGA-DX-A1L2-01A	4.05167	1	5.72567	4.51599	1.08912	3.11669	2.70917
TCGA-DX-A1L3-01A	1.41	1	5.45945	4.23726	1.41179	1.23691	2.5751
TCGA-DX-A1L4-01A	0.930833	1	5.6139	3.80098	1.88503	1.28969	1.68699
TCGA-DX-A23R-01A	6.2175	0	5.41217	3.44708	2.15588	0.313045	3.29817
TCGA-DX-A23T-01A	0.285	1	6.29815	4.52574	1.75399	1.4556	3.03853
TCGA-DX-A23U-01A	2.39	1	4.88785	4.3477	1.81768	2.69871	1.6708
TCGA-DX-A23V-01A	1.035	1	6.55455	4.88554	1.57459	0.73707	2.56496
TCGA-DX-A23Y-01A	0.470833	1	6.18486	4.75192	1.23559	0.732668	1.97047
TCGA-DX-A23Z-01A	2.05583	1	4.83297	4.45799	1.22825	1.26361	2.52321
TCGA-DX-A240-01A	5.02083	0	4.40389	3.45318	1.25381	0.60957	5.6759
TCGA-DX-A2IZ-01A	0.714167	0	5.84765	2.749	5.27463	1.8992	3.02882
TCGA-DX-A2J0-01A	0.583333	1	4.77594	4.64258	1.85828	1.3759	1.91488
TCGA-DX-A2J1-01A	7.94167	0	5.25824	4.66179	1.78966	0.585054	2.49604
TCGA-DX-A2J4-01A	6.5925	0	5.6166	4.25027	1.49344	2.45036	4.3461
TCGA-DX-A3LS-01A	0.3125	1	5.47647	3.99178	1.29438	0.810851	2.14861
TCGA-DX-A3LT-01A	3.5675	1	5.56092	4.44103	0.930443	0.201524	2.38512
TCGA-DX-A3LU-01A	6.78917	1	4.88332	4.76999	1.069	0.504611	2.22303
TCGA-DX-A3LW-01A	9.82833	1	4.89819	4.60665	1.74614	2.39555	3.96795
TCGA-DX-A3LY-01B	2.78417	0	6.32809	4.39841	2.15	0.702464	2.85834
TCGA-DX-A3M1-01A	3.31833	1	4.6127	4.3644	2.1349	0.734231	2.89459
TCGA-DX-A3M2-01A	2.88833	0	4.96493	3.70369	1.33583	0.382317	2.52402
TCGA-DX-A3U5-01A	2.6525	0	5.97352	6.60328	1.49875	0.6598	2.1836
TCGA-DX-A3U6-01A	1.11167	1	5.88009	5.01518	2.06204	1.43147	2.07056
TCGA-DX-A3U7-01A	3.515	1	5.01545	3.35925	1.84813	1.05628	3.25854
TCGA-DX-A3U8-01A	0.35	1	6.36344	4.62123	2.68619	0.120266	2.51779
TCGA-DX-A3U9-01A	0.92	1	4.80122	4.39795	2.46286	0.677149	3.39961
TCGA-DX-A3UB-01A	6.15167	0	4.41706	5.43928	1.78991	4.71371	2.90642
TCGA-DX-A3UC-01A	3.52333	1	3.97635	4.56596	2.07725	0.592006	3.38542
TCGA-DX-A3UD-01A	2.39833	1	4.97781	4.00301	2.75997	0.166254	3.62247
TCGA-DX-A3UE-01A	0.613333	1	4.23774	5.14155	2.48595	0.368299	3.59902
TCGA-DX-A3UF-01A	5.28083	1	4.69484	4.68055	1.9521	1.14661	4.08126
TCGA-DX-A48J-01A	0.268333	1	5.45367	4.94938	1.66939	2.84667	3.53184
TCGA-DX-A48K-01A	3.83	0	4.66083	4.15073	1.792	1.20434	1.8713
TCGA-DX-A48L-01A	0.865	1	4.53988	4.21595	2.7054	1.47752	3.39508
TCGA-DX-A48N-01A	2.9375	0	5.13009	5.64137	2.61131	1.73037	1.81582
TCGA-DX-A48O-01A	4.39417	0	5.01997	5.13291	1.88201	1.00785	3.04282
TCGA-DX-A48P-01A	3.8325	0	4.82186	5.34517	1.54466	1.29709	3.74919
TCGA-DX-A48R-01A	0.8625	1	4.44506	3.56077	1.44527	0.211791	2.82729
TCGA-DX-A48U-01A	9.06167	0	5.41158	5.07289	1.26964	0.331641	2.99156
TCGA-DX-A6B7-01A	3.12917	0	4.74392	5.54899	1.16109	1.1111	3.85168
TCGA-DX-A6B8-01A	0.115	1	4.15779	2.87681	2.37132	0.257027	1.11555
TCGA-DX-A6B9-01A	3.11583	0	5.46203	5.38897	1.92307	3.16463	3.69788
TCGA-DX-A6BA-01A	4.08417	1	4.54746	3.87127	1.52457	0.969716	3.10443
TCGA-DX-A6BB-01A	3.025	0	4.58176	5.09719	1.21215	1.07506	3.94816
TCGA-DX-A6BE-01A	2.41167	0	5.658	4.82829	2.39462	1.35386	2.33181
TCGA-DX-A6BF-01A	2.5925	1	4.66858	4.3438	1.89021	0.492082	2.1923
TCGA-DX-A6BG-01A	1.41833	1	5.12982	4.08045	1.64914	0.852383	1.40286
TCGA-DX-A6BH-01A	0.635	1	4.71179	4.68957	1.37892	1.61949	1.50739
TCGA-DX-A6YR-01A	3.41417	0	5.16938	4.61267	2.35482	2.09634	2.93704
TCGA-DX-A6YS-01A	6.51833	0	5.42415	4.84412	3.07367	1.80847	2.45223
TCGA-DX-A6YT-01A	5.59583	0	5.60721	4.31461	2.16824	1.3887	3.03815
TCGA-DX-A6YU-01A	2.86083	0	6.12631	4.34325	3.4568	1.34258	2.49142
TCGA-DX-A6YV-01A	1.4125	1	4.82927	3.81577	2.68001	0.479965	1.82741
TCGA-DX-A6YX-01A	0.6075	1	5.55338	3.80217	2.18237	0.903915	2.66756
TCGA-DX-A6YZ-01A	7.18667	0	5.50726	5.32211	2.10873	2.63559	3.12708
TCGA-DX-A6Z2-01A	7.27917	1	5.90301	4.98085	2.40922	2.93523	3.04866
TCGA-DX-A7EF-01A	1.39917	1	4.98459	3.51256	1.39082	1.63181	2.05688
TCGA-DX-A7EI-01A	2.26667	1	4.57366	3.29092	2.50431	1.02721	2.44895
TCGA-DX-A7EL-01A	6.15667	1	5.59798	5.19354	1.62108	1.22337	2.70073
TCGA-DX-A7EM-01A	5.18	0	4.97223	3.87453	1.85215	0.733981	2.88723
TCGA-DX-A7EN-01A	0.963333	1	5.46784	4.05266	1.99047	0.619686	4.00593
TCGA-DX-A7EO-01A	12.6667	0	4.54152	3.82199	2.08592	2.54349	3.23769
TCGA-DX-A7EQ-01A	2.03167	1	3.50046	4.20214	2.3679	0.270337	2.53471
TCGA-DX-A7ES-01A	1.67	0	6.00686	4.78433	1.83872	4.41097	2.9789
TCGA-DX-A7ET-01A	1.2675	0	3.80656	4.06644	2.43066	0.204265	2.07799
TCGA-DX-A7EU-01A	1.97417	0	4.70188	4.88135	1.3124	0.865938	2.98424
TCGA-DX-A8BG-01A	0.903333	1	5.98855	3.94223	2.68609	0.978718	3.27366
TCGA-DX-A8BH-01A	0.745	1	4.29636	4.72805	1.55596	0.960886	2.32489
TCGA-DX-A8BK-01A	5.16083	0	4.39578	4.11245	3.10917	0.528011	1.98433
TCGA-DX-A8BL-01A	3.75917	0	4.77115	4.86467	2.22624	1.31535	4.41788
TCGA-DX-A8BM-01A	3.98583	0	4.57281	4.45558	2.75394	0.847886	2.88804
TCGA-DX-A8BN-01A	3.17833	0	5.1962	4.29458	1.9111	1.93517	3.49959
TCGA-DX-A8BO-01A	0.911667	1	4.78723	4.8457	1.29465	0.936554	3.43062
TCGA-DX-A8BP-01A	0.591667	1	5.24065	4.38158	3.4475	0.681038	2.02683
TCGA-DX-A8BQ-01A	4.3225	0	5.58663	4.8065	1.85122	0.872594	2.03401
TCGA-DX-A8BR-01A	12.5192	0	6.6078	4.33092	1.80075	0.957277	3.48981
TCGA-DX-A8BT-01A	1.82833	1	5.87813	4.53616	1.88037	0.676406	2.10619
TCGA-DX-A8BU-01A	2.83333	1	5.29714	4.06686	2.72348	0.456442	1.20027
TCGA-DX-A8BV-01A	1.56833	1	5.56288	4.0086	1.7577	1.21901	2.68572
TCGA-DX-A8BZ-01A	0.246667	1	3.45242	4.37367	2.57676	0.219929	3.56038
TCGA-DX-AB2E-01A	0.361667	1	4.35712	2.74295	3.1448	0.176451	0.884852
TCGA-DX-AB2F-01A	0.999167	0	5.73238	4.3693	1.51317	2.34363	2.42382
TCGA-DX-AB2G-01A	1.30833	0	5.4778	4.79347	1.54976	0.695808	2.83046
TCGA-DX-AB2H-01A	1.31917	0	5.1606	3.05771	5.01648	1.9169	2.4388
TCGA-DX-AB2L-01A	5.49417	0	4.80537	4.46891	1.45662	1.43524	2.09421
TCGA-DX-AB2O-01A	7.17	0	4.11537	3.76687	1.70771	0.900006	2.10923
TCGA-DX-AB2P-01A	0.440833	1	4.55363	3.55531	1.50719	0.584318	1.35503
TCGA-DX-AB2Q-01A	1.34167	1	4.89233	3.91337	3.4399	0.565472	1.46913
TCGA-DX-AB2S-01A	0.766667	0	5.89052	5.15456	1.29401	1.35862	2.69711
TCGA-DX-AB2T-01A	2.14667	1	6.01068	3.94183	2.83966	1.26198	2.98711
TCGA-DX-AB2V-01A	8.8725	0	5.24713	4.85984	2.05345	2.52594	3.93377
TCGA-DX-AB2W-01A	8.86417	0	4.22114	4.2526	2.48425	0.530373	1.94703
TCGA-DX-AB2X-01A	0.596667	1	4.83823	3.69868	1.74348	1.11807	2.35551
TCGA-DX-AB2Z-01A	4.19667	0	5.6068	4.49062	2.15912	0.534316	1.92862
TCGA-DX-AB30-01A	1.38	1	5.28354	3.4197	3.29369	2.53519	2.53105
TCGA-DX-AB32-01A	8.4925	0	5.7335	5.0174	1.98998	0.902364	3.06623
TCGA-DX-AB35-01A	0.7775	1	4.52704	4.02883	1.60165	1.46899	2.15064
TCGA-DX-AB3A-01A	2.14917	1	4.83976	4.02837	1.56604	1.79536	2.6119
TCGA-DX-AB3B-01A	4.2375	0	5.38276	4.24522	2.36795	1.49926	2.12665
TCGA-DX-AB3C-01A	5.08417	1	4.30553	3.71368	2.10982	0.692179	2.55198
TCGA-FX-A2QS-01A	4.0925	0	5.24066	4.37287	1.58678	0.598665	2.01193
TCGA-FX-A3NJ-01A	2.5925	0	5.80127	4.80209	1.86299	0.578865	3.6885
TCGA-FX-A3NK-01A	1.3825	0	5.48046	4.27886	1.28796	1.59151	1.92497
TCGA-FX-A3RE-01A	1.80667	0	5.06895	4.3648	1.39752	0.718896	2.65188
TCGA-FX-A3TO-01A	1.69167	0	5.26788	4.25805	1.77316	0.990176	1.64638
TCGA-FX-A48G-01A	0.46	1	3.72799	5.40313	2.00563	0.201515	1.65968
TCGA-FX-A76Y-01A	1.28917	0	5.2618	4.61083	2.15423	0.960375	1.93427
TCGA-HB-A2OT-01A	5.63167	0	5.00542	4.1226	2.2469	0.820018	4.30669
TCGA-HB-A3L4-01A	1.87	1	5.24602	4.42362	1.92369	0.328686	3.40683
TCGA-HB-A43Z-01A	2.4475	1	4.42747	3.51306	2.3246	0.609374	2.95565
TCGA-HS-A5N7-01A	2.77333	0	4.66216	3.74519	1.96913	1.33088	2.5719
TCGA-HS-A5N9-01A	4.33917	0	5.22093	3.67491	2.18267	0.0249164	2.19452
TCGA-HS-A5NA-01A	0.815833	0	5.85129	4.57259	2.52992	0.15391	3.09902
TCGA-IE-A3OV-01A	6.66583	1	5.49031	4.32919	2.13306	1.33484	3.28951
TCGA-IE-A4EH-01A	2.2425	0	4.9811	4.04432	2.55467	0.745263	2.5569
TCGA-IE-A4EI-01A	1.62583	0	4.63758	4.43389	2.42177	0.438542	3.71952
TCGA-IE-A4EJ-01A	0.268333	0	5.71369	5.0464	2.26096	2.42351	2.95921
TCGA-IE-A4EK-01A	0.115	0	5.85502	4.8252	1.63617	0.573961	3.99821
TCGA-IE-A6BZ-01A	1.65667	0	6.0397	3.9484	1.54864	1.16476	2.66057
TCGA-IF-A3RQ-01A	1.2075	1	5.12735	4.70996	1.99415	0.235655	1.75776
TCGA-IF-A4AJ-01A	2.03167	1	4.39871	3.7499	2.37601	1.15243	2.52501
TCGA-IF-A4AK-01A	4.3525	0	4.90751	3.8953	2.51448	0.655302	2.75932
TCGA-IS-A3K7-01A	0.325833	1	3.80039	5.06517	2.19002	0.520483	2.76793
TCGA-IS-A3K8-01A	13.2642	0	4.73203	5.30641	1.88419	1.8016	3.41346
TCGA-IS-A3KA-01A	0.208333	1	3.62092	4.62002	2.36096	0.0985163	2.94622
TCGA-IW-A3M4-01A	6.04167	1	5.5812	4.68222	1.76051	0.67325	2.21296
TCGA-IW-A3M5-01A	0.025	1	3.61408	3.99482	2.97581	3.16207	2.36897
TCGA-IW-A3M6-01A	1.88333	0	4.93425	5.50102	2.35786	0.608117	2.71012
TCGA-JV-A5VE-01A	1.36583	0	5.54862	4.20908	1.62015	0.287636	1.9391
TCGA-K1-A3PN-01A	2.82833	1	5.24626	4.47753	1.92438	0.64082	2.97016
TCGA-K1-A3PO-01A	4.44083	0	5.34215	4.77121	2.20868	3.00464	2.93939
TCGA-K1-A42W-01A	2.26167	1	5.48391	4.51902	1.9526	0.959915	3.73599
TCGA-K1-A42X-01A	5.65083	1	5.70607	4.28652	2.47895	0.904141	2.20776
TCGA-K1-A6RT-01A	0.353333	1	5.66683	4.73542	2.45222	0.718586	2.34899
TCGA-K1-A6RU-01A	0.388333	1	5.57955	4.39387	2.64239	2.53078	3.13662
TCGA-K1-A6RV-01A	0.4325	0	4.04001	3.64497	1.84539	0.0794643	1.38608
TCGA-KD-A5QS-01A	0.9825	1	5.56131	4.06153	2.27095	0.491344	2.00588
TCGA-KD-A5QT-01A	1.36583	0	5.94575	4.28527	2.82684	0.876837	2.07162
TCGA-KD-A5QU-01A	2.90167	1	4.41729	4.79759	2.2868	0.5124	1.49072
TCGA-KF-A41W-01A	0.975	0	4.64989	3.69282	2.18318	1.07744	1.65736
TCGA-LI-A67I-01A	1.57167	1	4.71475	3.58092	2.20006	0.645605	1.51803
TCGA-LI-A9QH-01A	1.16583	1	4.92993	4.27807	2.06313	0.483165	2.83188
TCGA-MB-A5Y8-01A	2.11583	0	4.24349	4.86169	1.88263	0.413718	2.08383
TCGA-MB-A5Y9-01A	0.69	0	5.36613	4.65782	1.70498	1.89063	2.89393
TCGA-MB-A5YA-01A	0.0408333	0	4.78572	5.63561	1.78469	0.904134	3.79966
TCGA-MB-A8JK-01A	1.80917	0	5.4219	3.51104	2.28257	1.29478	2.7552
TCGA-MB-A8JL-01A	1.6425	0	5.28838	4.77512	2.18069	3.88155	1.77451
TCGA-MJ-A68H-01A	1.24833	0	4.81208	4.51142	2.73727	0.817922	2.20618
TCGA-MJ-A68J-01A	0.733333	1	5.34651	4.76624	2.75626	1.80289	2.52446
TCGA-MJ-A850-01A	1.86417	0	4.89163	4.22409	2.33283	0.640154	1.81614
TCGA-MO-A47P-01A	0.963333	0	6.22365	5.36032	1.86751	1.33131	3.80755
TCGA-MO-A47R-01A	0.709167	1	4.69406	5.26963	3.63377	1.02834	3.02435
TCGA-N1-A6IA-01A	0.3175	1	4.71667	3.73895	1.83643	1.03683	1.04925
TCGA-PC-A5DK-01A	10.2383	0	5.0388	5.05967	1.77921	1.60017	3.75601
TCGA-PT-A8TR-01A	2.22583	0	5.25293	4.57577	3.5616	1.81613	3.51231
TCGA-QC-A6FX-01A	1.74417	0	4.90273	4.39452	2.16968	2.09291	3.1749
TCGA-QC-A7B5-01A	0.709167	1	3.96509	4.06857	1.96756	0.317829	2.29441
TCGA-QC-AA9N-01A	1.47	0	4.65302	4.01867	2.92732	0.945942	2.63807
TCGA-QQ-A5V2-01A	0.153333	0	3.89109	4.26233	1.89214	0.252928	1.91853
TCGA-QQ-A5V9-01A	1.10833	1	4.42444	4.64229	2.41671	2.85284	2.48106
TCGA-QQ-A5VB-01A	4.04083	1	4.42002	4.30664	1.55664	0.59067	1.63789
TCGA-QQ-A5VC-01A	2.98917	0	4.48784	3.83	2.28176	0.11603	2.79853
TCGA-QQ-A5VD-01A	3.09083	0	4.53659	4.52559	1.55826	1.50203	2.96298
TCGA-QQ-A8VB-01A	7.3425	1	5.05804	4.82041	2.91206	1.23551	3.53988
TCGA-QQ-A8VD-01A	5.62583	1	4.6606	3.66074	1.41468	1.43921	2.04738
TCGA-QQ-A8VF-01A	9.32417	0	5.28817	4.35994	1.91406	0.234028	1.01674
TCGA-QQ-A8VG-01A	5.07	1	5.79567	4.26429	2.5982	1.94802	1.98014
TCGA-QQ-A8VH-01A	0.86	1	4.74812	4.64818	2.21811	0.2245	2.71851
TCGA-RN-A68Q-01A	0.06	0	5.58242	4.90011	2.9746	0.816272	3.42002
TCGA-RN-AAAQ-01A	0.840833	1	4.47503	5.15284	4.00919	0.436937	2.67704
TCGA-SG-A6Z4-01A	0.2875	1	5.08866	3.86896	3.06982	0.382064	1.82859
TCGA-SG-A849-01A	1.45917	0	5.24497	4.67204	2.58205	0.988628	2.37028
TCGA-SI-A71O-01A	1.87	1	5.05863	4.77384	3.07719	0.560462	0.940026
TCGA-SI-A71P-01A	2.11083	0	5.38156	5.12112	2.87498	1.37835	3.07219
TCGA-SI-A71Q-01A	2.72667	0	5.73523	3.72477	1.44775	3.21799	3.3977
TCGA-SI-AA8C-01A	0.7475	1	4.66707	3.85768	3.39426	3.22526	2.5955
TCGA-UE-A6QT-01A	1.10083	0	5.62743	5.35292	2.60059	1.47699	3.0575
TCGA-UE-A6QU-01A	1.11667	0	4.74503	4.19865	1.21992	0.458131	2.81849
TCGA-VT-A80G-01A	0.0708333	1	4.99953	3.70454	1.1437	0.530981	1.41535
TCGA-VT-A80J-01A	0.971667	1	5.92656	4.21239	3.15421	1.88568	2.92734
TCGA-VT-AB3D-01A	1.0375	0	5.39289	4.81813	2.04675	0.91174	2.69779
TCGA-WK-A8XO-01A	0.2875	1	4.834	4.3254	2.06339	3.3959	2.03373
TCGA-WK-A8XQ-01A	0.0741667	1	5.54375	3.55058	2.53393	1.28895	2.20006
TCGA-WK-A8XS-01A	7.06	0	4.81866	3.75974	2.08219	0.867478	3.09562
TCGA-WK-A8XT-01A	2.70167	1	5.75903	3.74956	2.52644	1.93684	2.5059
TCGA-WK-A8XX-01A	3.06583	1	5.33735	4.26914	2.65186	0.899715	4.02255
TCGA-WK-A8XY-01A	4.18583	1	4.62908	4.48858	2.49989	1.57257	3.11784
TCGA-WK-A8XZ-01A	3.01667	1	4.71417	4.45876	1.95185	0.720406	2.88943
TCGA-WK-A8Y0-01A	1.31667	1	4.75251	3.73082	3.09775	0.102771	1.18936
TCGA-WP-A9GB-01A	0.585833	1	4.20106	3.98782	2.84117	0.340084	3.32238
TCGA-X2-A95T-01A	5.275	0	5.39959	3.85622	3.40073	0.507662	2.20812
TCGA-X6-A7W8-01A	0.4	1	3.70552	3.93628	2.27057	0.284206	2.36052
TCGA-X6-A7WA-01A	2.98917	0	4.8804	4.80735	2.14876	0.89995	3.71194
TCGA-X6-A7WB-01A	0.98	1	4.98753	4.03125	2.35362	0.250223	2.65722
TCGA-X6-A7WC-01A	2.81667	1	4.42922	3.91447	2.26466	0.436743	1.23818
TCGA-X6-A7WD-01A	1.5275	1	4.98315	3.82638	2.51022	1.69286	3.12556
TCGA-X6-A8C2-01A	1.59083	1	5.87963	3.87637	1.56531	0.327399	2.04245
TCGA-X6-A8C3-01A	1.59583	0	5.58706	4.3589	1.68736	0.362603	2.42073
TCGA-X6-A8C4-01A	1.38	1	4.96023	3.4383	2.20761	0.156159	1.23205
TCGA-X6-A8C5-01A	4.235	0	5.15873	4.75355	2.1718	1.8176	3.95615
TCGA-X6-A8C6-01A	2.66917	1	5.40828	4.59668	2.44051	3.6485	2.90869
TCGA-X6-A8C7-01A	2.4525	0	5.58406	4.02129	2.63362	1.19487	3.03331
TCGA-X9-A971-01A	0.909167	1	4.40996	3.31722	2.46227	0.393114	2.86535
TCGA-X9-A973-01A	0.325833	1	4.58769	5.131	3.44928	1.12448	3.15276
TCGA-Z4-A8JB-01A	0.364167	0	4.27323	3.30653	1.43935	0.713434	1.48101
TCGA-Z4-A9VC-01A	1.11417	0	7.46511	4.25008	2.16594	1.42267	2.59538
TCGA-Z4-AAPF-01A	1.3275	0	4.86294	4.71279	2.33116	1.25409	2.68386
TCGA-Z4-AAPG-01A	1.33083	0	4.0984	4.11003	2.17244	0.414213	1.96423
